# Supplementary material for: Optimizing the deposition of CdSe colloidal quantum dots on TiO2film electrode via capping ligand induced self-assembly approach
Source: Royal Society of Chemistry journal article supplement (doi:10.1039/c5ra17412k), 2015-01-01
Supplement: c5ra17412k1.pdf [file c5ra17412k1.pdf]

# Optimizing the deposition of CdSe colloidal quantum dots on TiO<sub>2</sub> film electrode *via* capping ligand induced self-assembly approach

Xinxin Meng, Jun Du, Hua Zhang and Xinhua Zhong\*

Shanghai Key Laboratory of Functional Materials Chemistry, Institute of Applied Chemistry, East China University of Science and Technology, Shanghai 200237, China

E-mail: zhongxh@ecust.edu.cn (for X. Z.).

Fax/Tel: +86 21 6425 0281

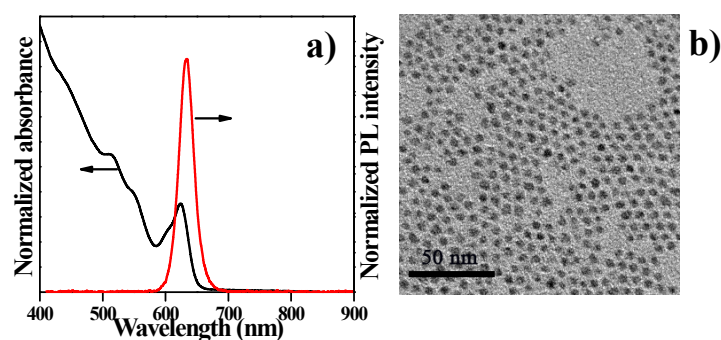

**Fig. S1** (a) UV-vis, PL and (b) TEM of OAm-capped CdSe QD

**Table S1** The details of photovoltaic performance of solar cells based on different pH of CdSe QD aqueous solution in the absence of free ligand

| pH | $V_{oc}$ (V) | $J_{sc}$ (mA/cm <sup>2</sup> ) | FF    | PCE (%) |
|----|--------------|--------------------------------|-------|---------|
| 8  | 0.623        | 5.36                           | 0.644 | 2.15    |
|    | 0.607        | 5.13                           | 0.639 | 1.99    |
|    | 0.612        | 5.20                           | 0.650 | 2.07    |
|    | 0.609        | 5.32                           | 0.675 | 2.20    |
|    | 0.613        | 5.30                           | 0.658 | 2.14    |
| 9  | 0.610        | 11.69                          | 0.632 | 4.51    |
|    | 0.616        | 11.92                          | 0.656 | 4.82    |
|    | 0.620        | 11.85                          | 0.649 | 4.77    |
|    | 0.613        | 12.06                          | 0.638 | 4.72    |
|    | 0.609        | 11.99                          | 0.642 | 4.69    |
| 10 | 0.612        | 14.12                          | 0.639 | 5.52    |
|    | 0.602        | 14.07                          | 0.626 | 5.30    |
|    | 0.611        | 14.02                          | 0.641 | 5.49    |
|    | 0.617        | 13.92                          | 0.657 | 5.64    |
|    | 0.617        | 14.05                          | 0.635 | 5.50    |
| 11 | 0.612        | 14.89                          | 0.642 | 5.85    |
|    | 0.613        | 14.92                          | 0.632 | 5.78    |
|    | 0.604        | 14.83                          | 0.661 | 5.92    |
|    | 0.615        | 14.79                          | 0.646 | 5.88    |
|    | 0.604        | 14.80                          | 0.642 | 5.74    |
| 12 | 0.616        | 15.36                          | 0.649 | 6.14    |
|    | 0.613        | 15.23                          | 0.632 | 5.90    |
|    | 0.618        | 15.10                          | 0.645 | 6.02    |
|    | 0.607        | 15.48                          | 0.650 | 6.11    |
|    | 0.614        | 15.33                          | 0.634 | 5.98    |

**Table S2** Details of Photovoltaic performance of solar cells based on different concentrations of free MPA ligand at pH 12.0

| MPA (M) | $V_{oc}$ (V) | $J_{sc}$ (mA/cm <sup>2</sup> ) | FF    | PCE (%) |
|---------|--------------|--------------------------------|-------|---------|
| 0       | 0.615        | 14.97                          | 0.639 | 5.88    |
|         | 0.606        | 15.20                          | 0.653 | 6.01    |
|         | 0.608        | 14.97                          | 0.647 | 5.89    |
|         | 0.619        | 15.40                          | 0.630 | 6.01    |
|         | 0.610        | 15.52                          | 0.637 | 6.03    |
|         | 0.619        | 15.63                          | 0.652 | 6.30    |
|         | 0.617        | 15.66                          | 0.657 | 6.35    |
|         | 0.05         | 0.622                          | 15.64 | 0.640   |
| 0.619   |              | 15.60                          | 0.652 | 6.30    |
| 0.614   |              | 15.63                          | 0.644 | 6.18    |
| 0.618   |              | 15.94                          | 0.669 | 6.59    |
| 0.616   |              | 15.97                          | 0.650 | 6.39    |
| 0.1     |              | 0.618                          | 15.85 | 0.663   |
|         | 0.617        | 15.86                          | 0.658 | 6.44    |
|         | 0.620        | 15.93                          | 0.660 | 6.52    |
|         | 0.616        | 15.89                          | 0.669 | 6.55    |
|         | 0.612        | 15.82                          | 0.655 | 6.34    |
| 0.3     | 0.616        | 15.95                          | 0.662 | 6.50    |
|         | 0.618        | 15.88                          | 0.668 | 6.56    |
|         | 0.624        | 15.82                          | 0.653 | 6.44    |

**Table S3** Details of photovoltaic performance of solar cells based on different pH of CdSe QD solution in the presence of 0.1 M free MPA ligand

| pH | $V_{oc}$ (V) | $J_{sc}$ (mA/cm <sup>2</sup> ) | FF    | PCE (%) |
|----|--------------|--------------------------------|-------|---------|
| 8  | 0.613        | 15.98                          | 0.656 | 6.42    |
|    | 0.627        | 15.99                          | 0.654 | 6.56    |
|    | 0.616        | 15.89                          | 0.654 | 6.41    |
|    | 0.610        | 15.97                          | 0.652 | 6.36    |
|    | 0.620        | 15.98                          | 0.645 | 6.40    |
| 9  | 0.613        | 15.90                          | 0.654 | 6.38    |
|    | 0.615        | 15.89                          | 0.667 | 6.52    |
|    | 0.626        | 15.98                          | 0.649 | 6.50    |
|    | 0.614        | 15.91                          | 0.658 | 6.43    |
|    | 0.621        | 15.95                          | 0.649 | 6.43    |
| 10 | 0.618        | 15.86                          | 0.660 | 6.47    |
|    | 0.605        | 15.92                          | 0.662 | 6.38    |
|    | 0.622        | 15.94                          | 0.659 | 6.54    |
|    | 0.630        | 15.98                          | 0.652 | 6.56    |
|    | 0.619        | 15.96                          | 0.660 | 6.52    |
| 11 | 0.618        | 15.90                          | 0.657 | 6.46    |
|    | 0.620        | 15.88                          | 0.659 | 6.49    |
|    | 0.616        | 15.86                          | 0.659 | 6.44    |
|    | 0.620        | 15.97                          | 0.652 | 6.47    |
|    | 0.617        | 15.95                          | 0.650 | 6.40    |
| 12 | 0.616        | 15.95                          | 0.659 | 6.47    |
|    | 0.620        | 15.98                          | 0.662 | 6.56    |
|    | 0.619        | 15.96                          | 0.658 | 6.50    |
|    | 0.617        | 15.87                          | 0.650 | 6.37    |
|    | 0.615        | 15.92                          | 0.649 | 6.38    |

**Table S4** Details of photovoltaic performance of solar cells based on different deposition temperatures

| Temperature (°C) | $V_{oc}$ (V) | $J_{sc}$ (mA/cm <sup>2</sup> ) | FF    | PCE (%) |
|------------------|--------------|--------------------------------|-------|---------|
| 5                | 0.617        | 15.97                          | 0.639 | 6.30    |
|                  | 0.621        | 15.98                          | 0.651 | 6.46    |
|                  | 0.621        | 15.88                          | 0.652 | 6.43    |
|                  | 0.623        | 15.96                          | 0.645 | 6.42    |
|                  | 0.615        | 15.88                          | 0.660 | 6.45    |
| 25               | 0.619        | 15.91                          | 0.650 | 6.57    |
|                  | 0.616        | 15.96                          | 0.645 | 6.34    |
|                  | 0.617        | 15.80                          | 0.648 | 6.32    |
|                  | 0.616        | 15.94                          | 0.647 | 6.35    |
|                  | 0.618        | 15.93                          | 0.659 | 6.49    |
| 50               | 0.616        | 15.95                          | 0.648 | 6.37    |
|                  | 0.613        | 15.96                          | 0.641 | 6.27    |
|                  | 0.613        | 15.89                          | 0.658 | 6.41    |
|                  | 0.619        | 15.91                          | 0.664 | 6.54    |
|                  | 0.612        | 15.90                          | 0.659 | 6.41    |

**Table S5** Details of photovoltaic performance of solar cells based on different concentrations of CdSe QD solution

| Concentration<br>( $\mu\text{M}$ ) | $V_{oc}$ (V) | $J_{sc}$ ( $\text{mA}/\text{cm}^2$ ) | FF    | PCE (%) |
|------------------------------------|--------------|--------------------------------------|-------|---------|
| 3.6                                | 0.620        | 15.95                                | 0.664 | 6.56    |
|                                    | 0.616        | 15.88                                | 0.663 | 6.49    |
|                                    | 0.616        | 15.80                                | 0.660 | 6.42    |
|                                    | 0.619        | 15.85                                | 0.639 | 6.27    |
|                                    | 0.618        | 15.89                                | 0.663 | 6.51    |
| 1.8                                | 0.610        | 15.99                                | 0.662 | 6.46    |
|                                    | 0.616        | 15.92                                | 0.656 | 6.43    |
|                                    | 0.620        | 15.85                                | 0.649 | 6.38    |
|                                    | 0.613        | 15.96                                | 0.662 | 6.48    |
|                                    | 0.619        | 15.99                                | 0.660 | 6.53    |
| 0.72                               | 0.612        | 15.92                                | 0.669 | 6.52    |
|                                    | 0.622        | 15.97                                | 0.646 | 6.42    |
|                                    | 0.619        | 15.92                                | 0.641 | 6.32    |
|                                    | 0.617        | 15.92                                | 0.657 | 6.45    |
|                                    | 0.617        | 15.95                                | 0.655 | 6.45    |
| 0.36                               | 0.606        | 15.94                                | 0.650 | 6.28    |
|                                    | 0.617        | 15.72                                | 0.666 | 6.46    |
|                                    | 0.619        | 15.85                                | 0.669 | 6.56    |
|                                    | 0.620        | 15.85                                | 0.649 | 6.38    |
|                                    | 0.616        | 15.80                                | 0.647 | 6.30    |

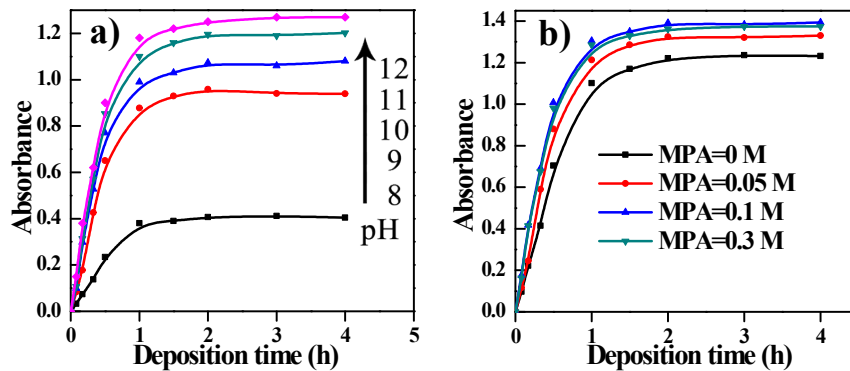

**Fig. S2** Temporal evolution of the absorbance at first excitonic absorption peak of CdSe-sensitized TiO<sub>2</sub> films deposition under QD aqueous solution with (a) different pH values, (b) different MPA concentrations

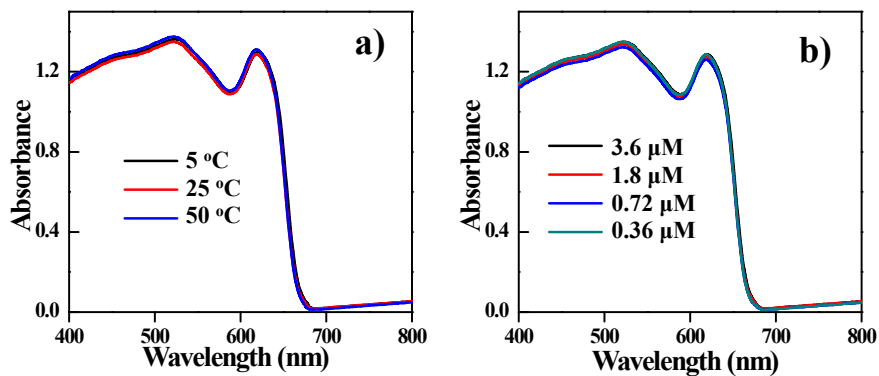

**Fig. S3** (a) UV-vis absorption spectra of CdSe-sensitized films which contains only transparent layer prepared under different absorption temperatures and (b) UV-vis absorption spectra of CdSe-sensitized films which contains only transparent layer prepared under different concentrations of CdSe QD solution
